# Supplementary material for: The role of ammonia in promoting ammonia borane synthesis
Source: Royal Society of Chemistry journal article supplement (doi:10.1039/c6dt02925f), 2016-01-01
Supplement: c6dt02925f1.pdf [file c6dt02925f1.pdf]

**Electronic Supplementary Information**

**The Role of Ammonia in Promoting Ammonia Borane  
Synthesis**

P. Veeraraghavan Ramachandran\* and Ameya S. Kulkarni

*Herbert C. Brown Center for Borane Research, Department of Chemistry, Purdue University,*

*560 Oval Drive, West Lafayette, Indiana 47907-2084*

E-mail: [chandran@purdue.edu](mailto:chandran@purdue.edu)

## Table of Contents:

|                                                                                           |      |
|-------------------------------------------------------------------------------------------|------|
| <sup>11</sup> B NMR spectra of AB ( <b>1</b> )                                            | 3    |
| <sup>1</sup> H NMR spectra of AB ( <b>1</b> )                                             | 4    |
| <sup>1</sup> H NMR spectra of AB from deuterium labelling study                           | 5    |
| <sup>1</sup> H NMR spectra of ND <sub>3</sub> BH <sub>3</sub>                             | 6    |
| <sup>1</sup> H NMR spectra of product from deuterium labelling study (control experiment) | 7    |
| <sup>11</sup> B NMR spectra representing results from Table 4                             | 8-19 |
| DSC analysis of AB ( <b>1</b> )                                                           | 20   |
| TG analysis of AB ( <b>1</b> )                                                            | 21   |

**$^{11}\text{B}$  NMR spectra of AB (1)**

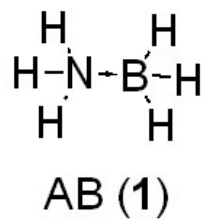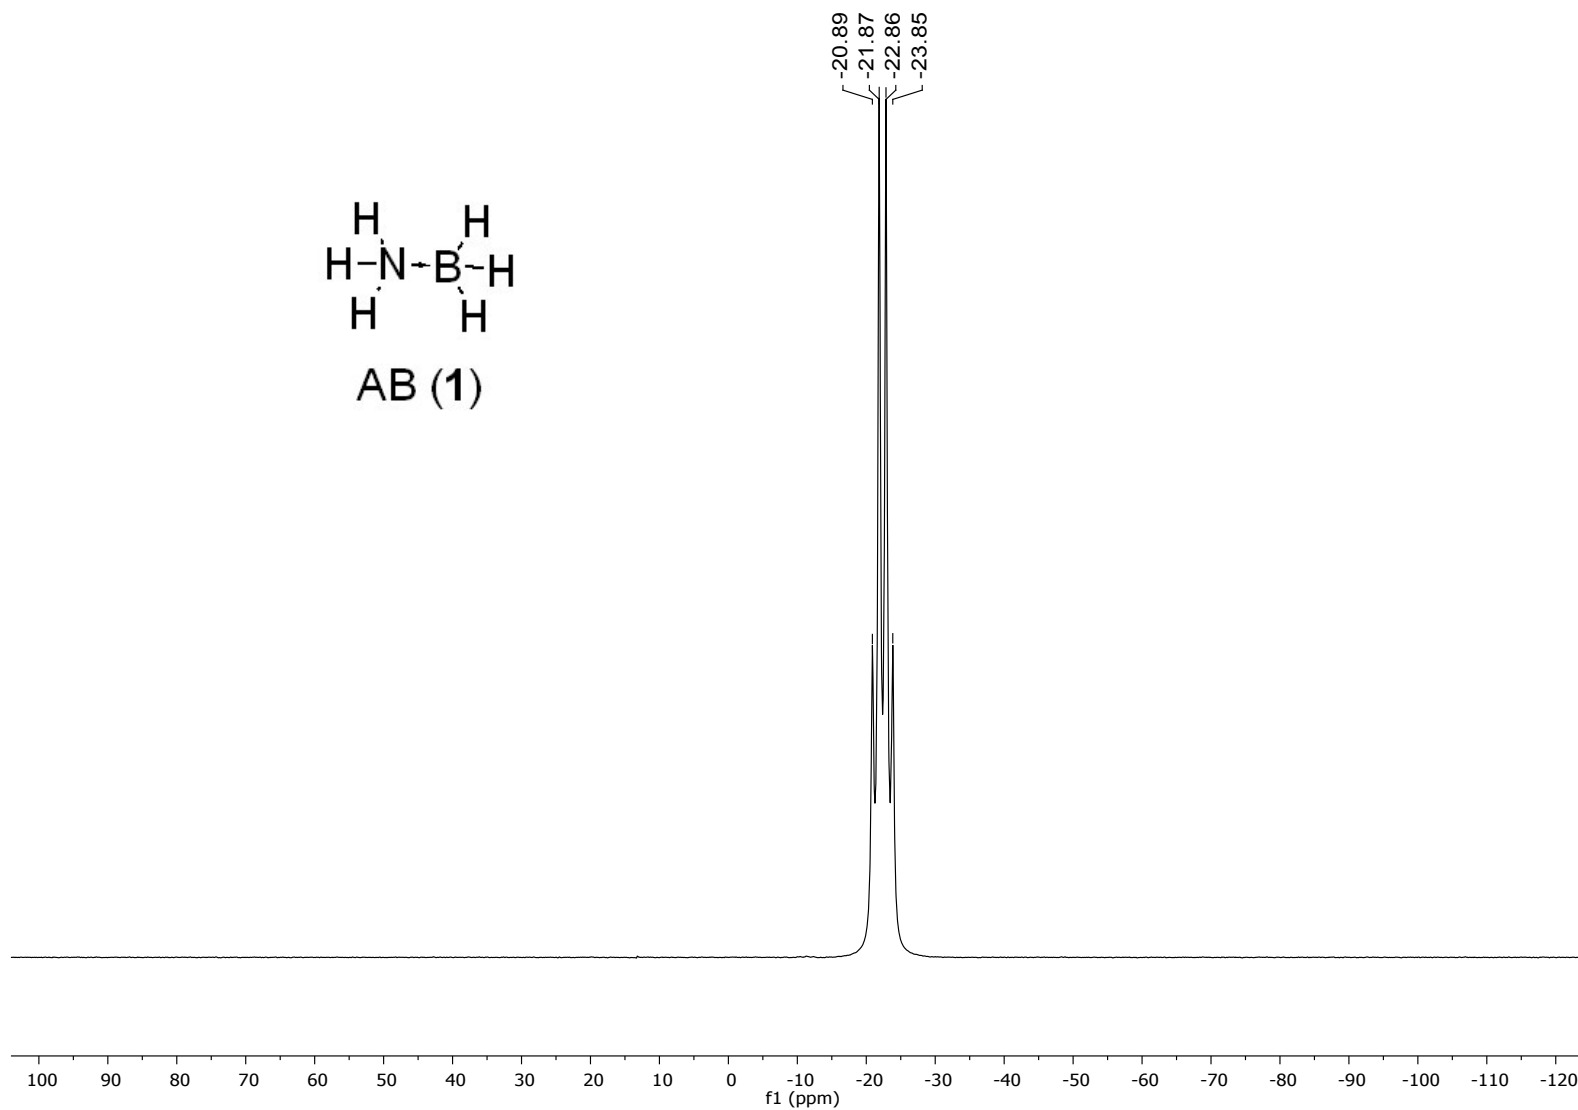

$^{11}\text{B}$  NMR (96 MHz, THF) Ammonia Borane (1)

**$^1\text{H}$  NMR spectra of AB (1)**

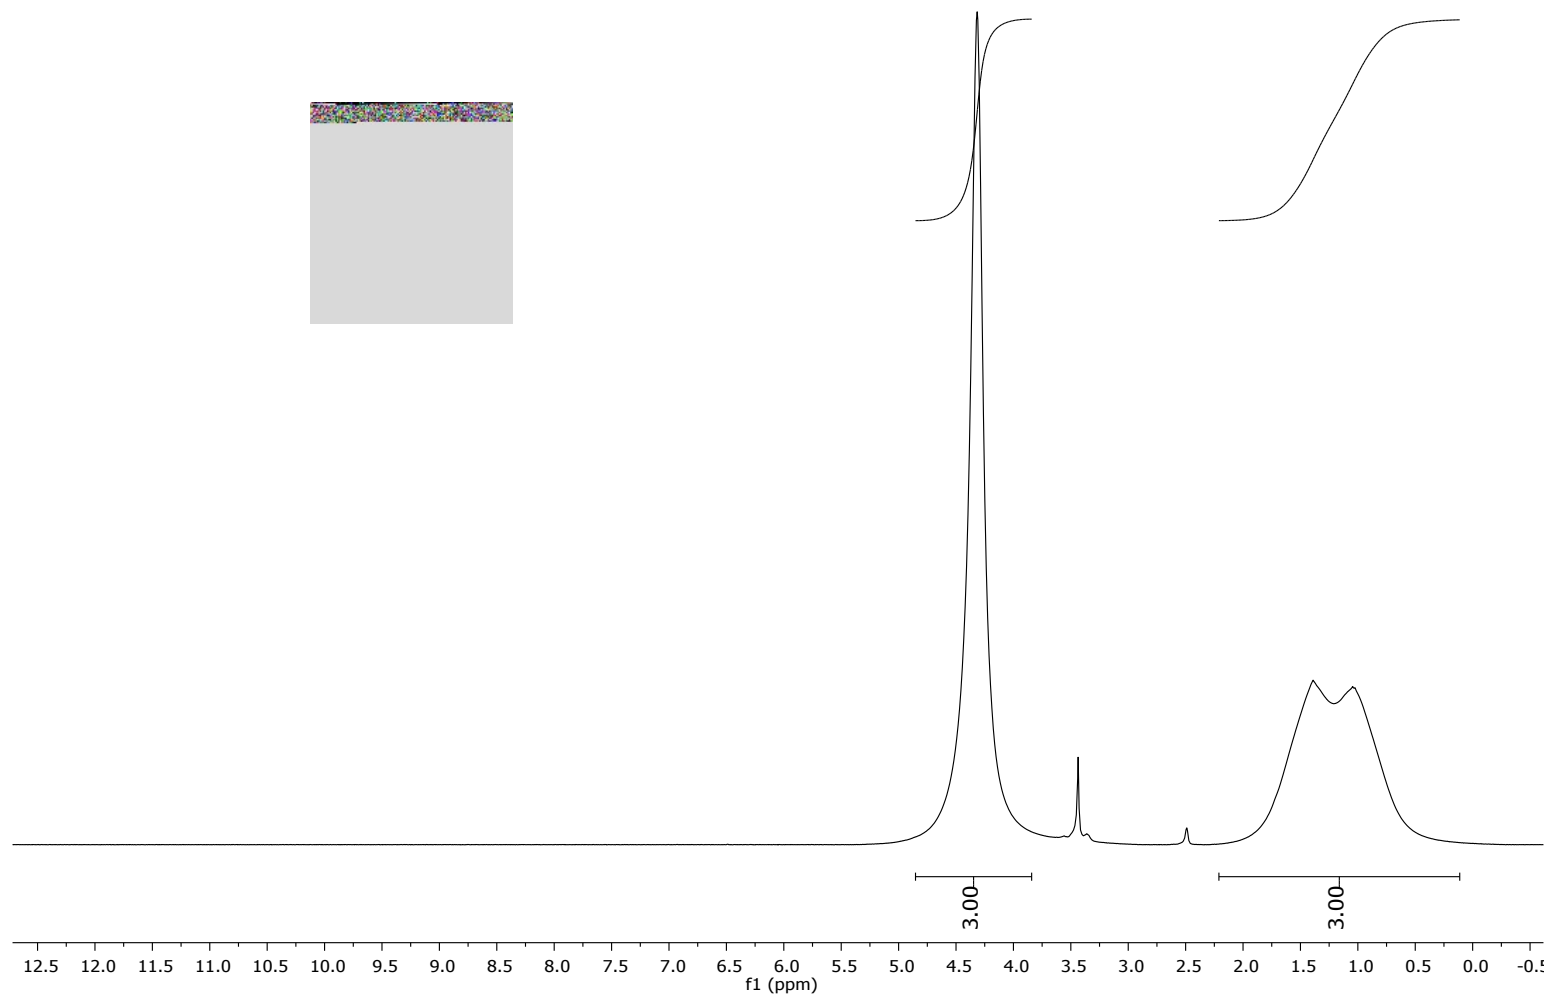

**$^1\text{H}$  NMR (300 MHz,  $\text{DMSO-}d_6$ ) Ammonia Borane (1)**

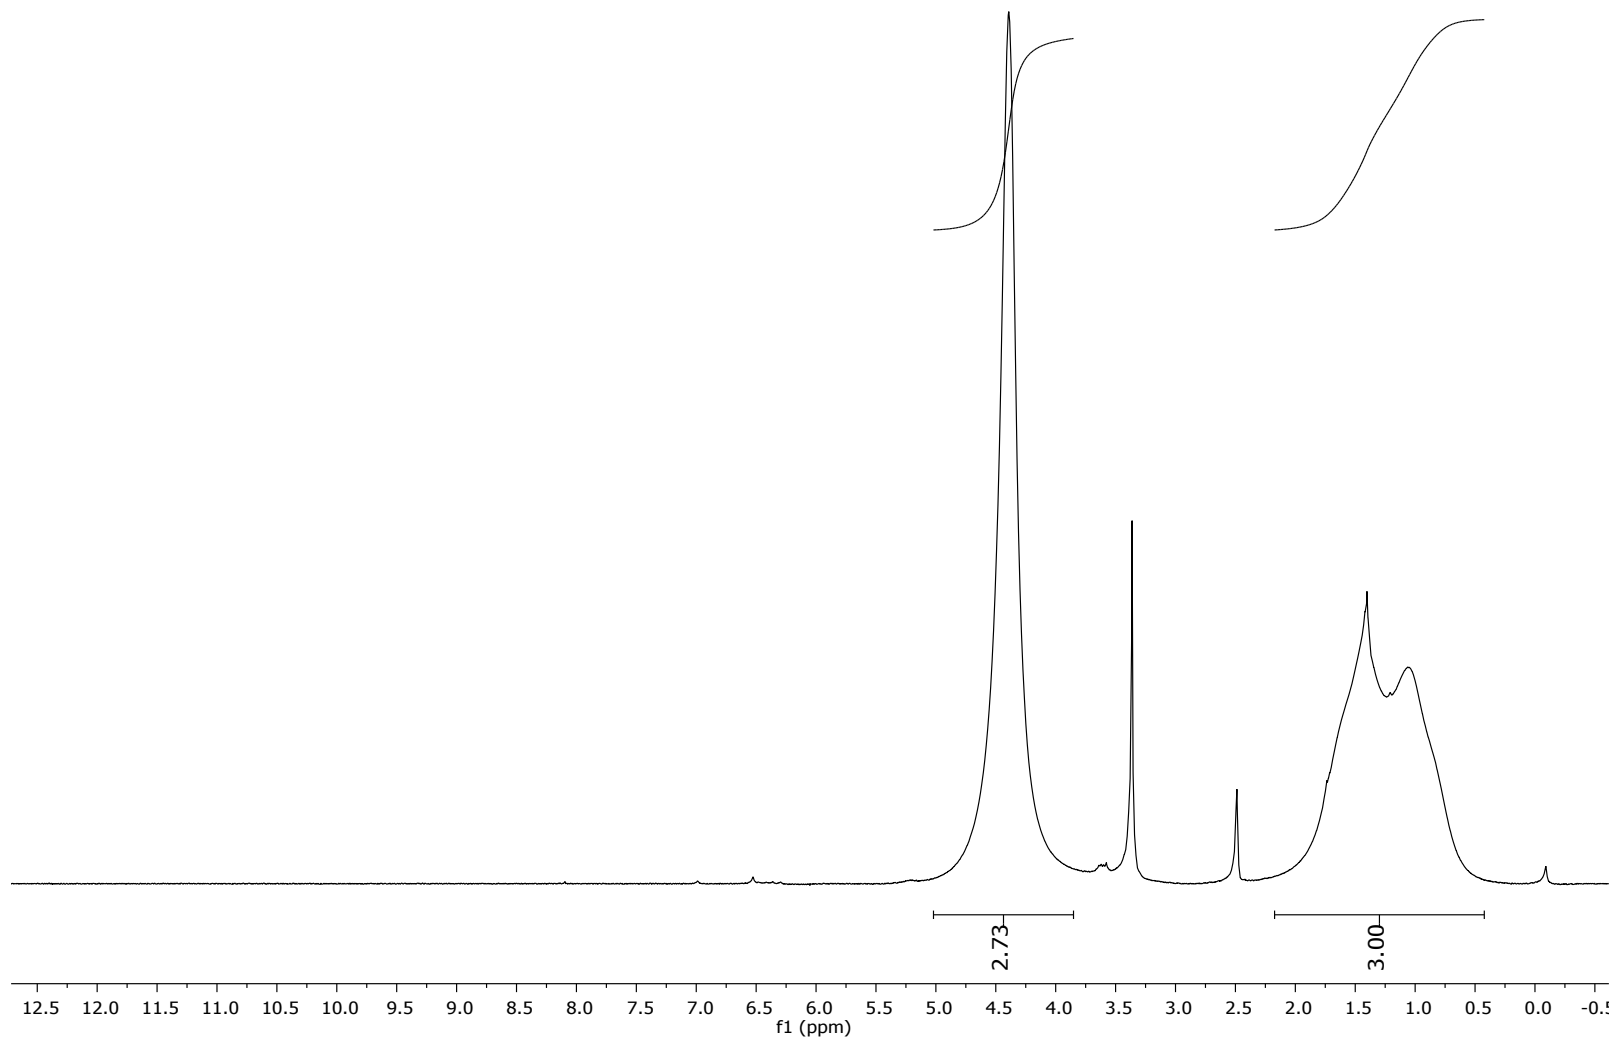

$^1\text{H}$  NMR (300 MHz,  $\text{DMSO-}d_6$ ) ammonia borane from deuterium labelling study

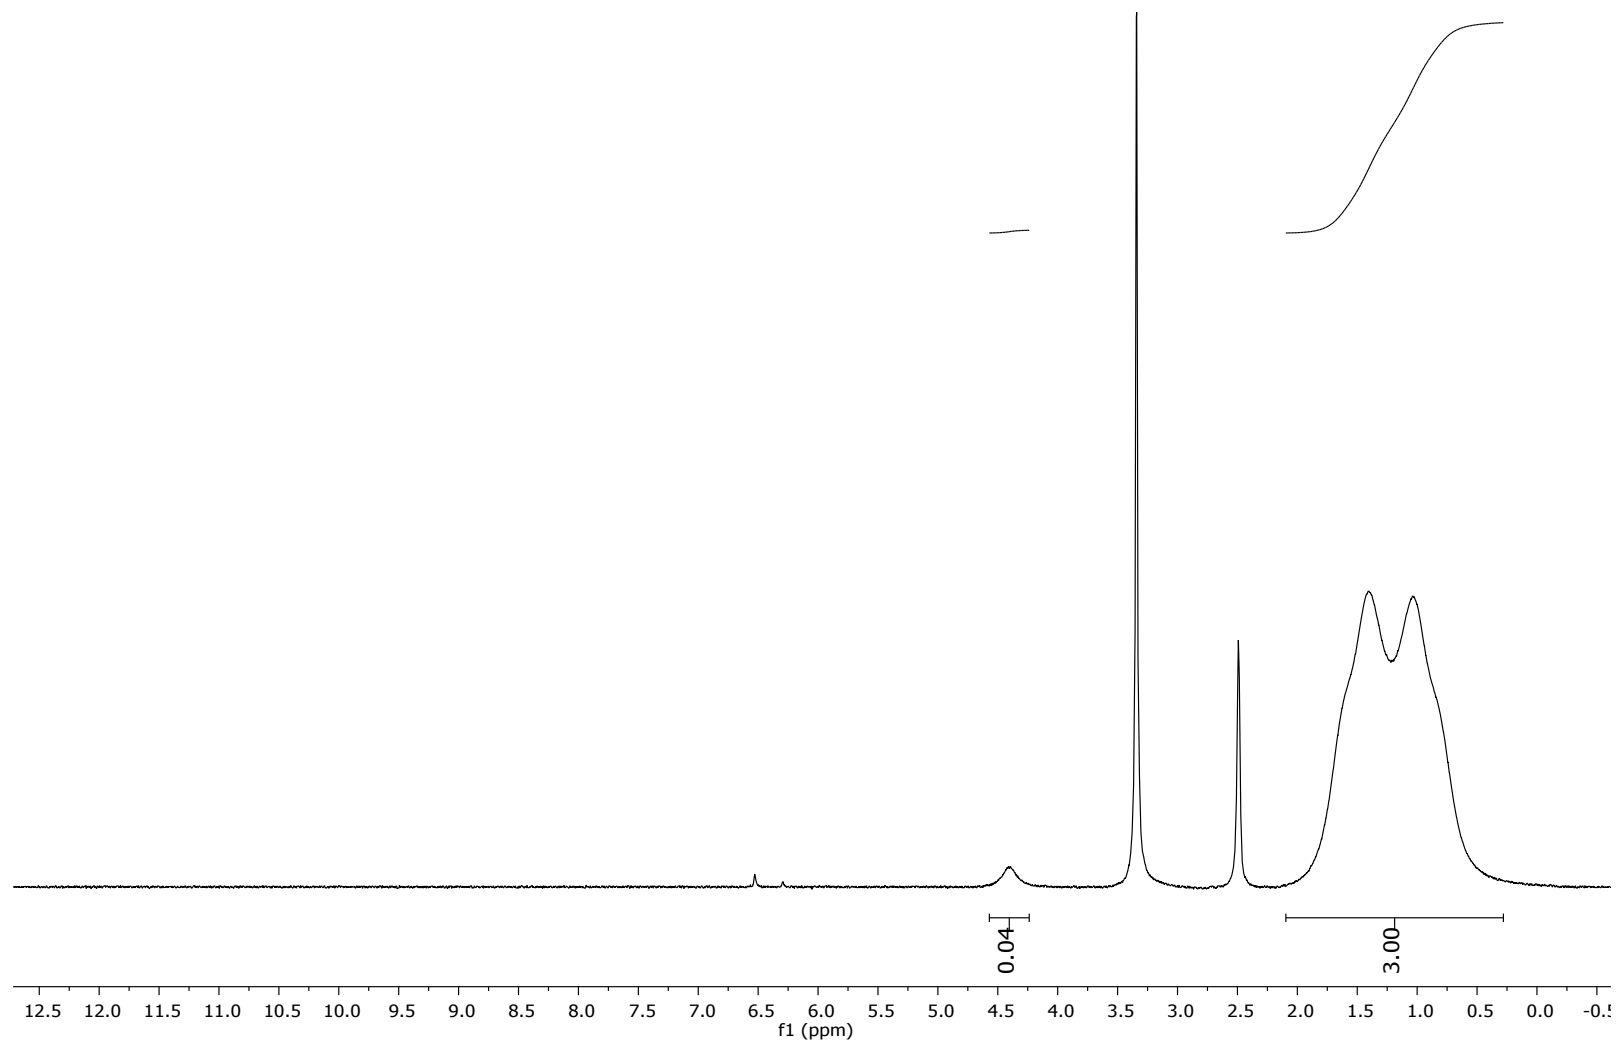

$^1\text{H}$  NMR (300 MHz,  $\text{DMSO-}d_6$ )  $\text{ND}_3\text{BH}_3$

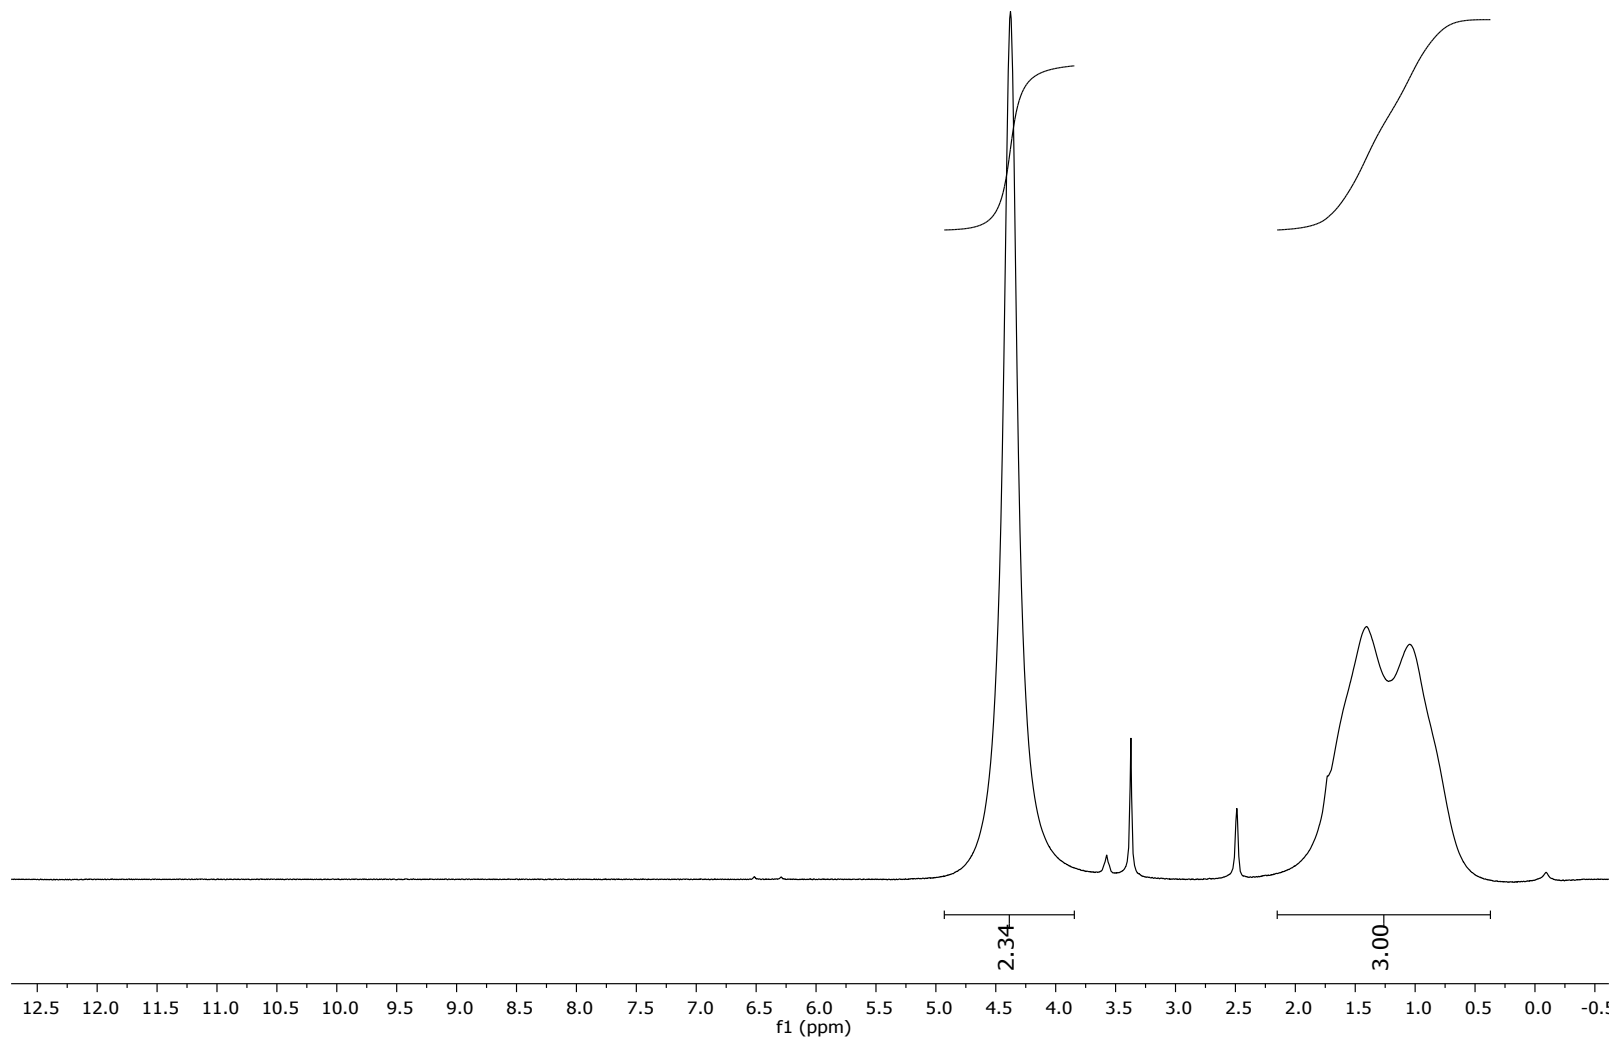

$^1\text{H}$  NMR (300 MHz,  $\text{DMSO-}d_6$ ) deuterium labelling (control experiment)

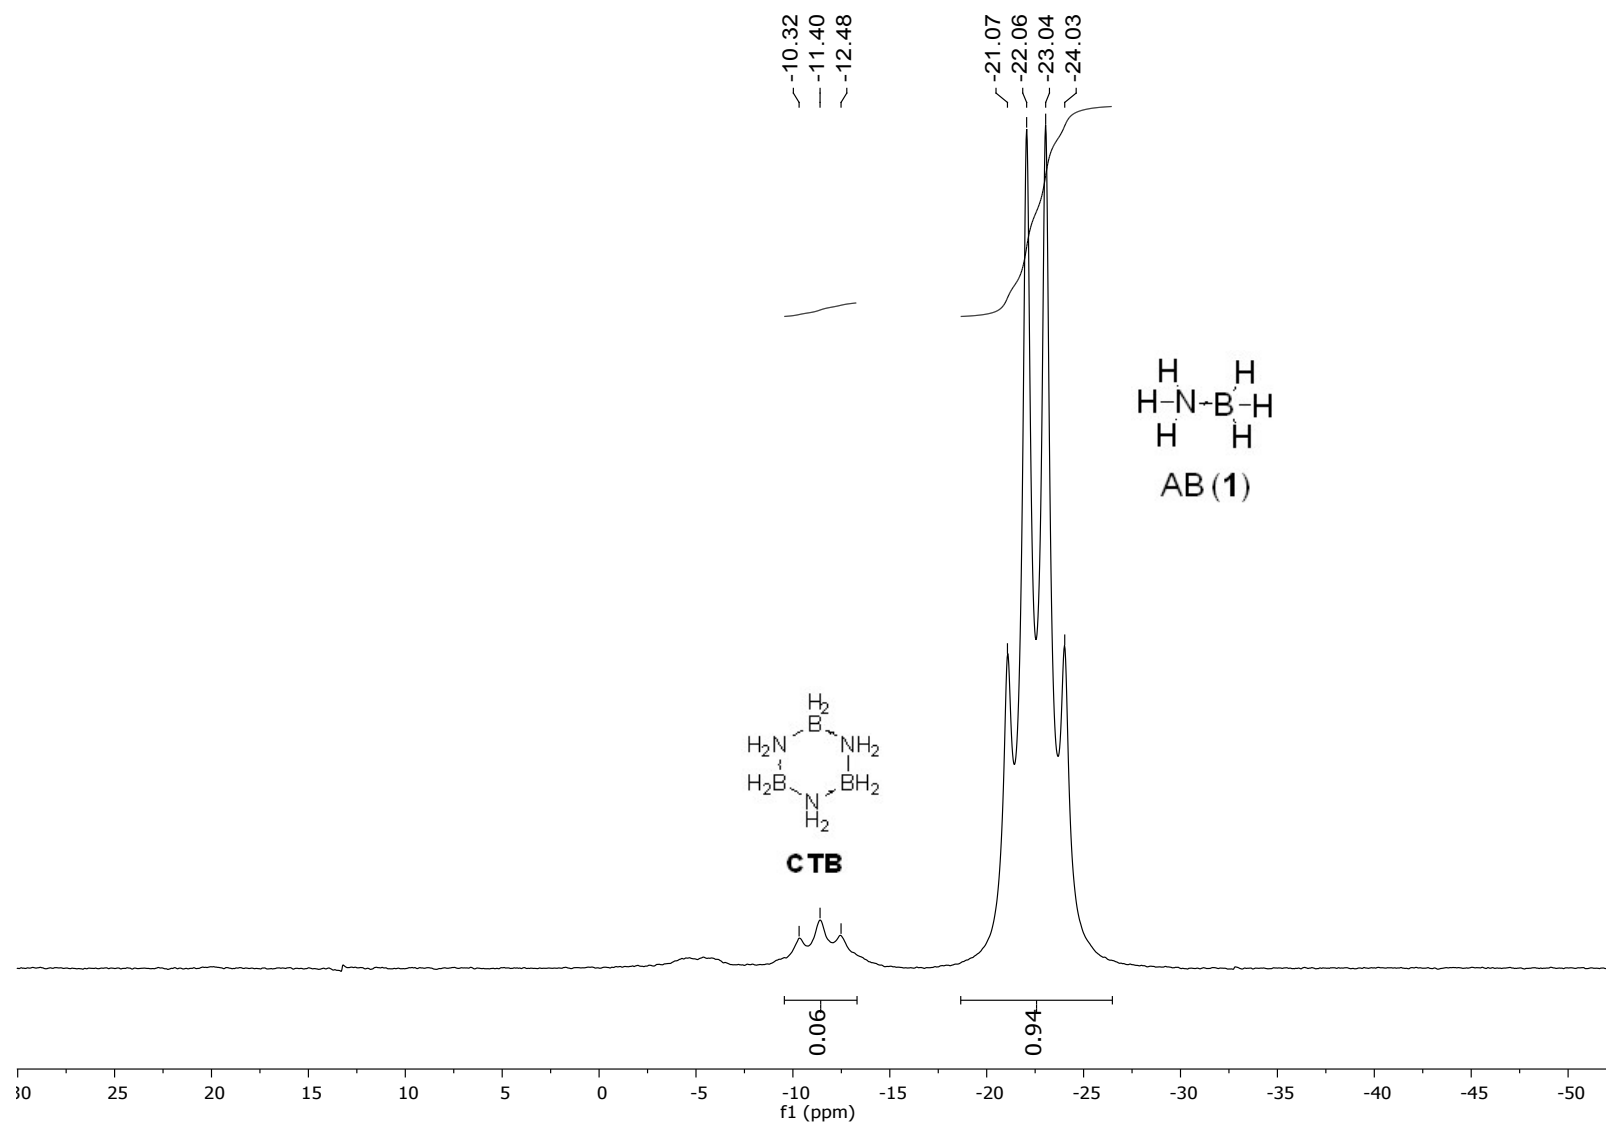

<sup>11</sup>B NMR (96 MHz, THF) for Table 3, Entry 1



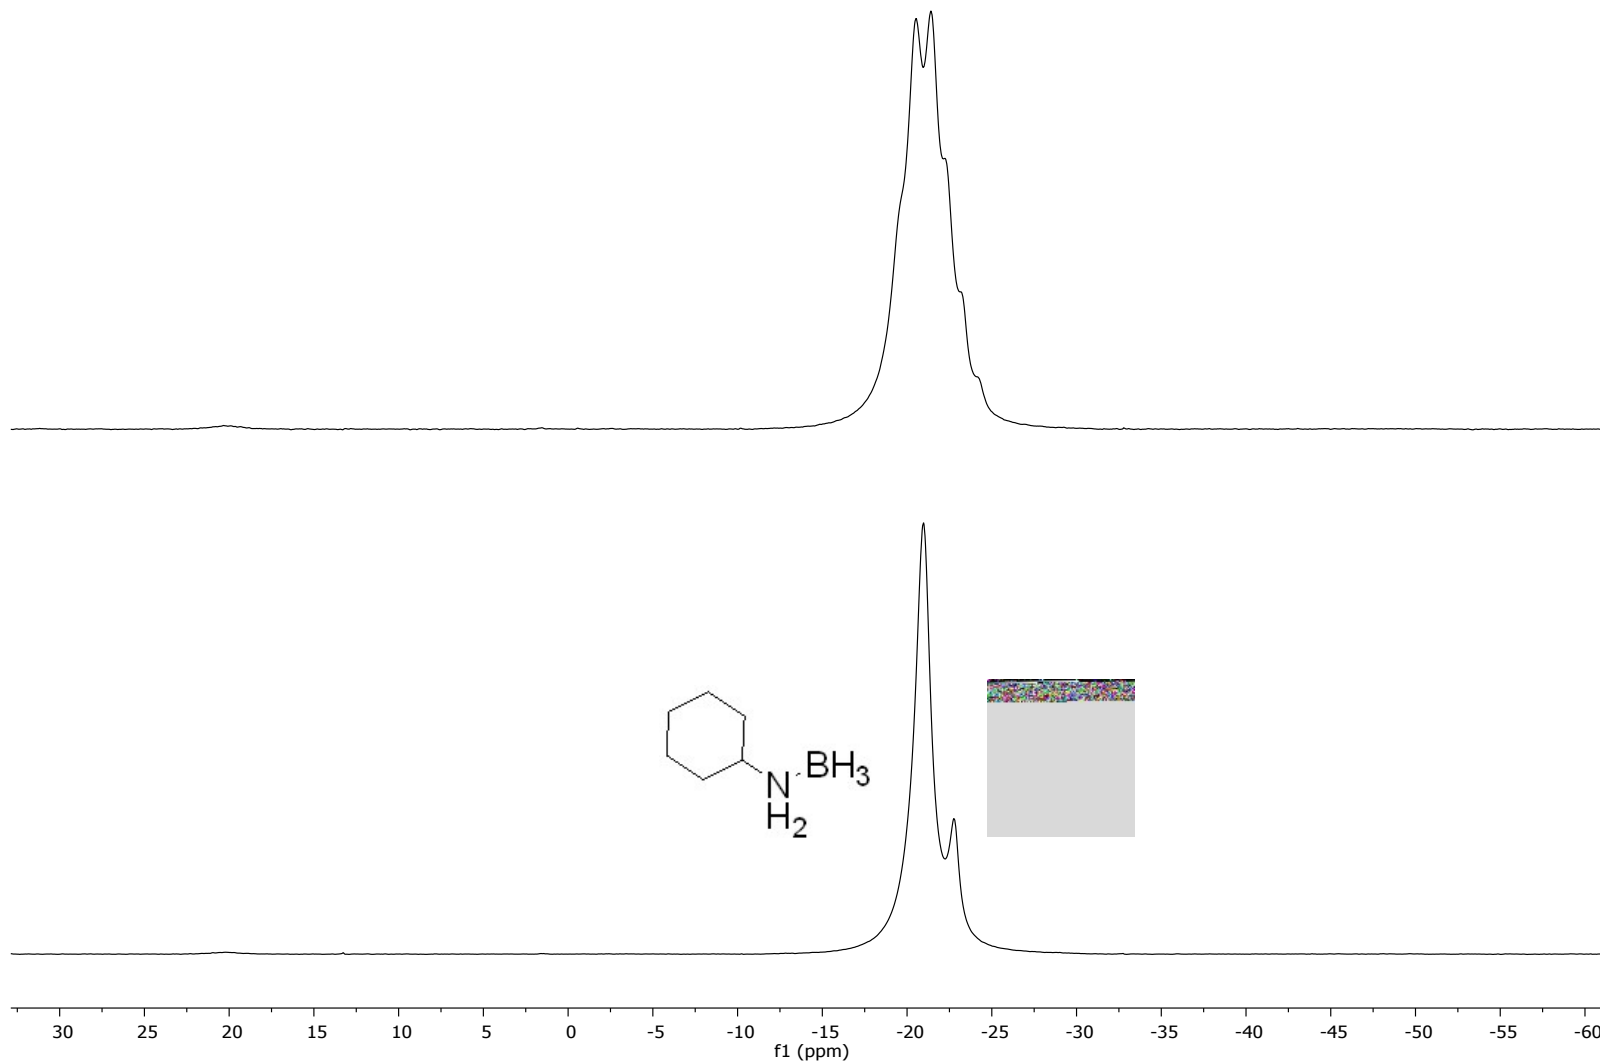

$^1\text{H}$  coupled and  $^1\text{H}$  decoupled spectra  $^{11}\text{B}$  NMR (96 MHz, THF) for Table 3, Entry 2

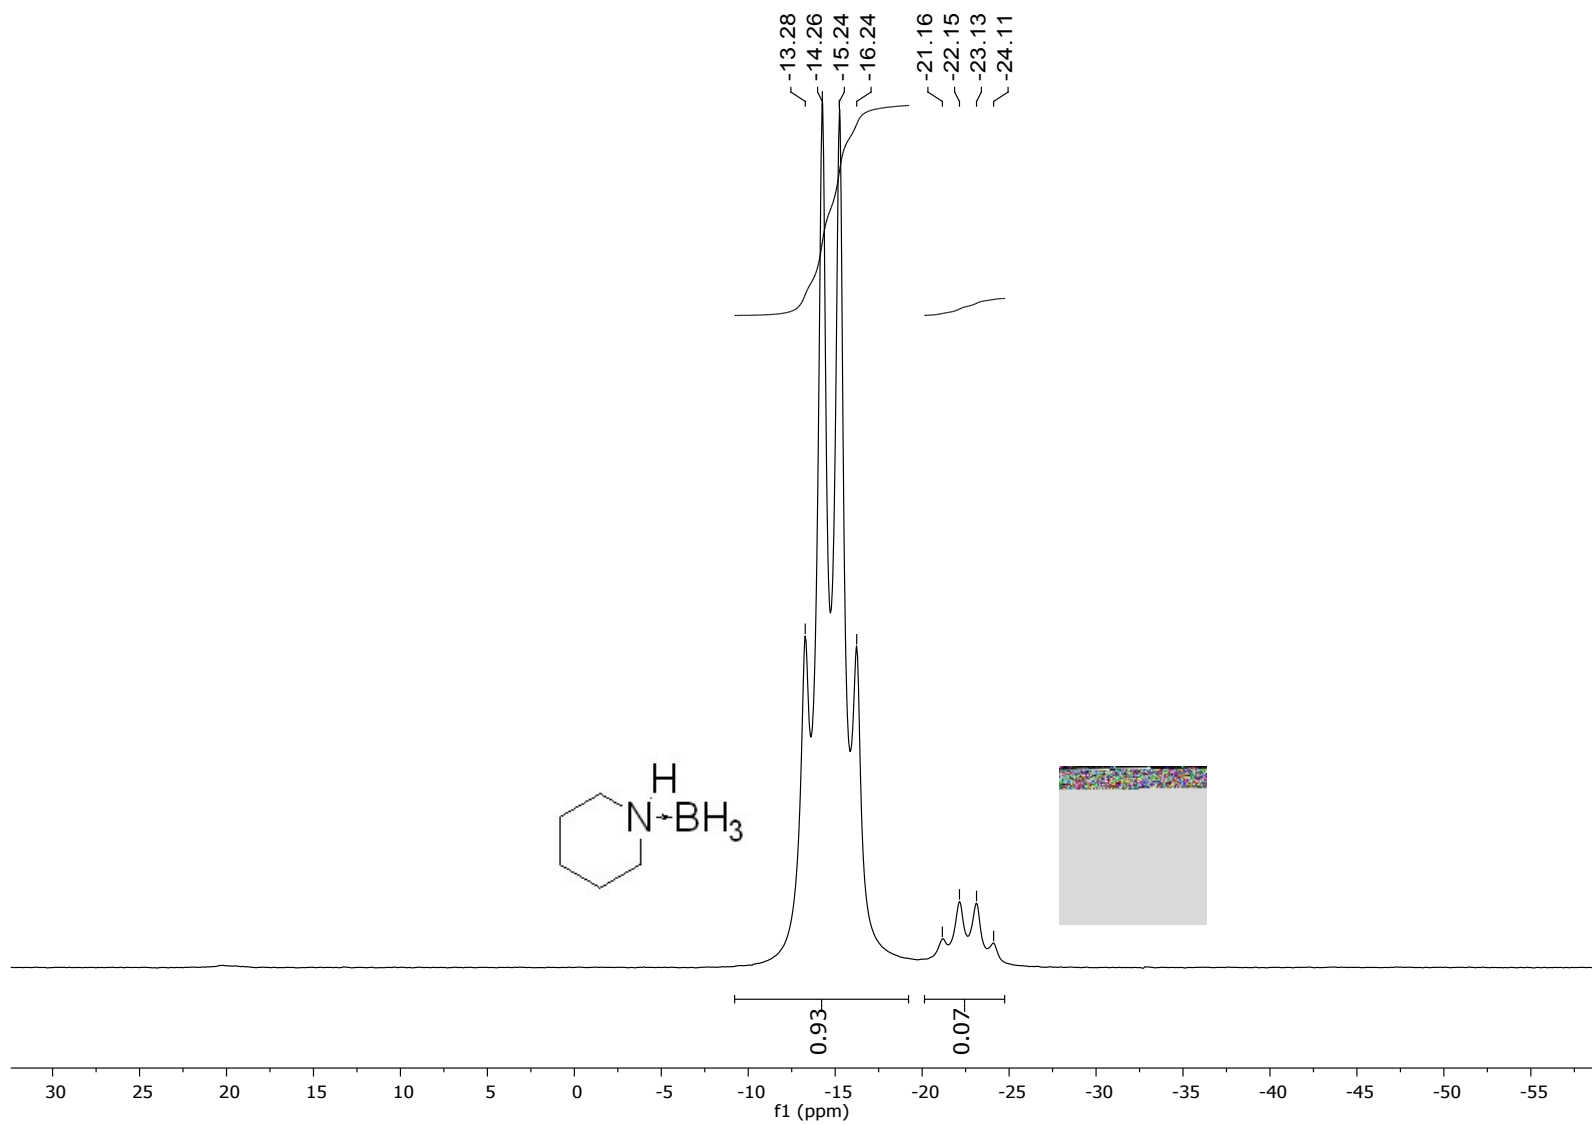

$^{11}\text{B}$  NMR (96 MHz, THF) for Table 3, Entry 3

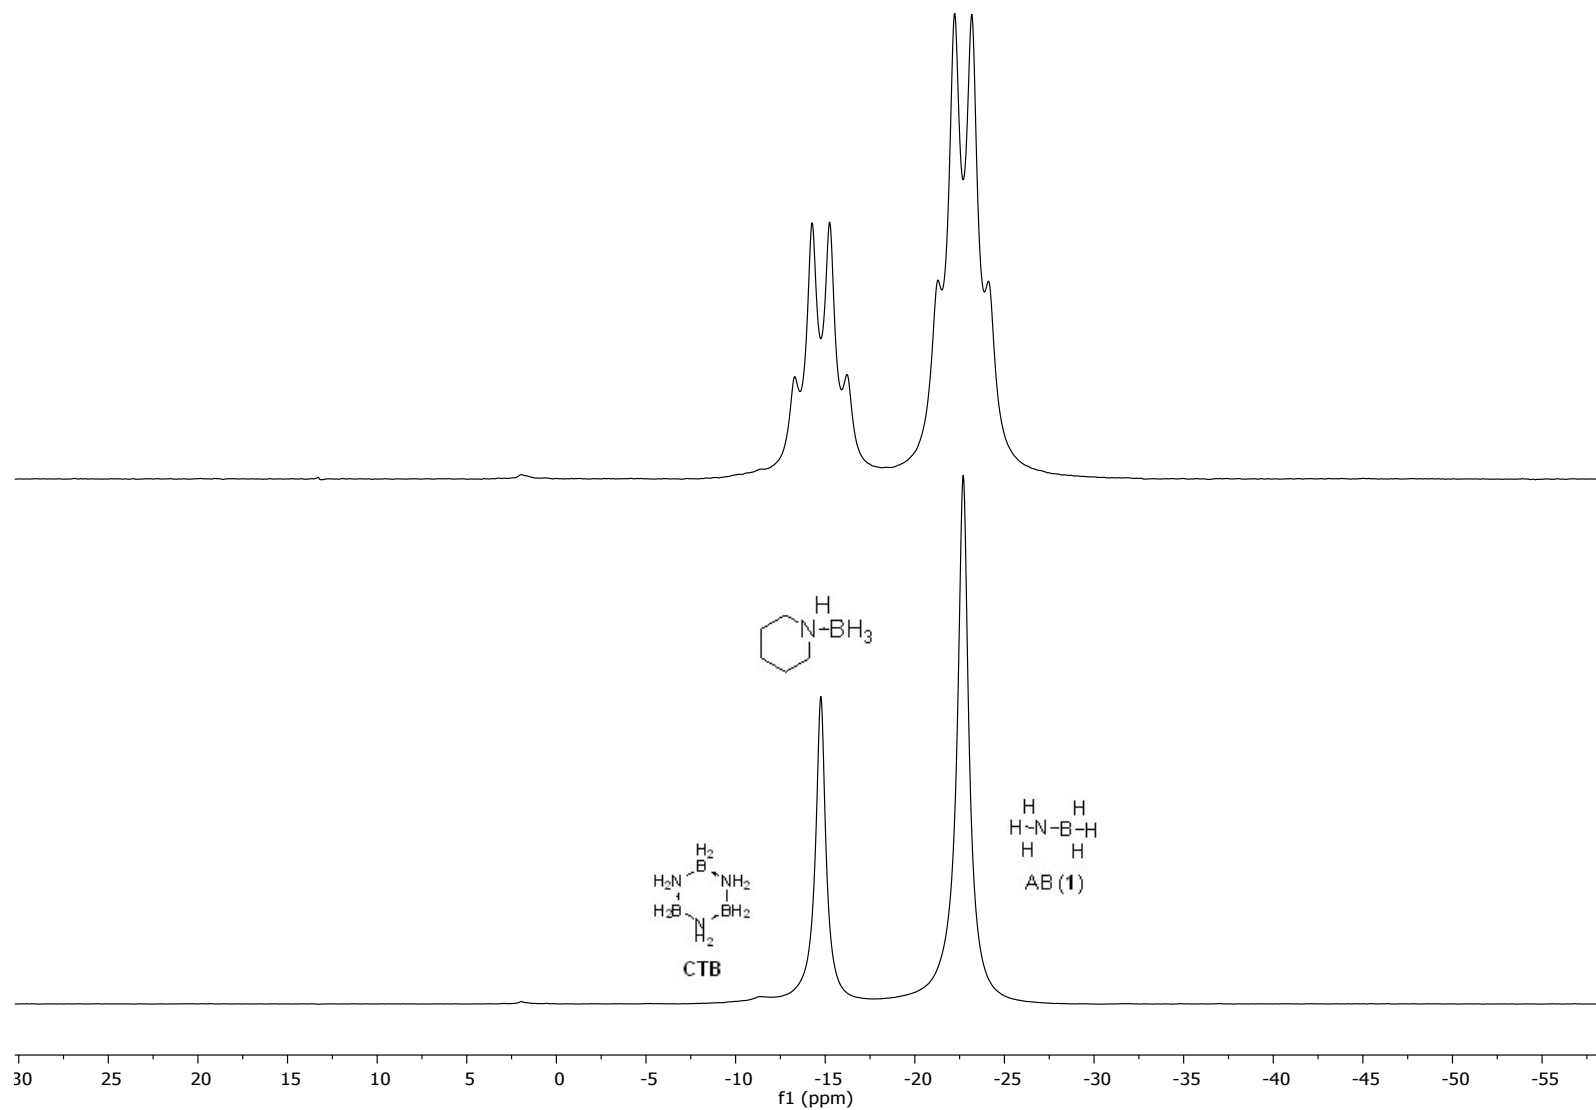

$^1\text{H}$  coupled and  $^1\text{H}$  decoupled spectra  $^{11}\text{B}$  NMR (96 MHz, THF) for Table 3, Entry 4

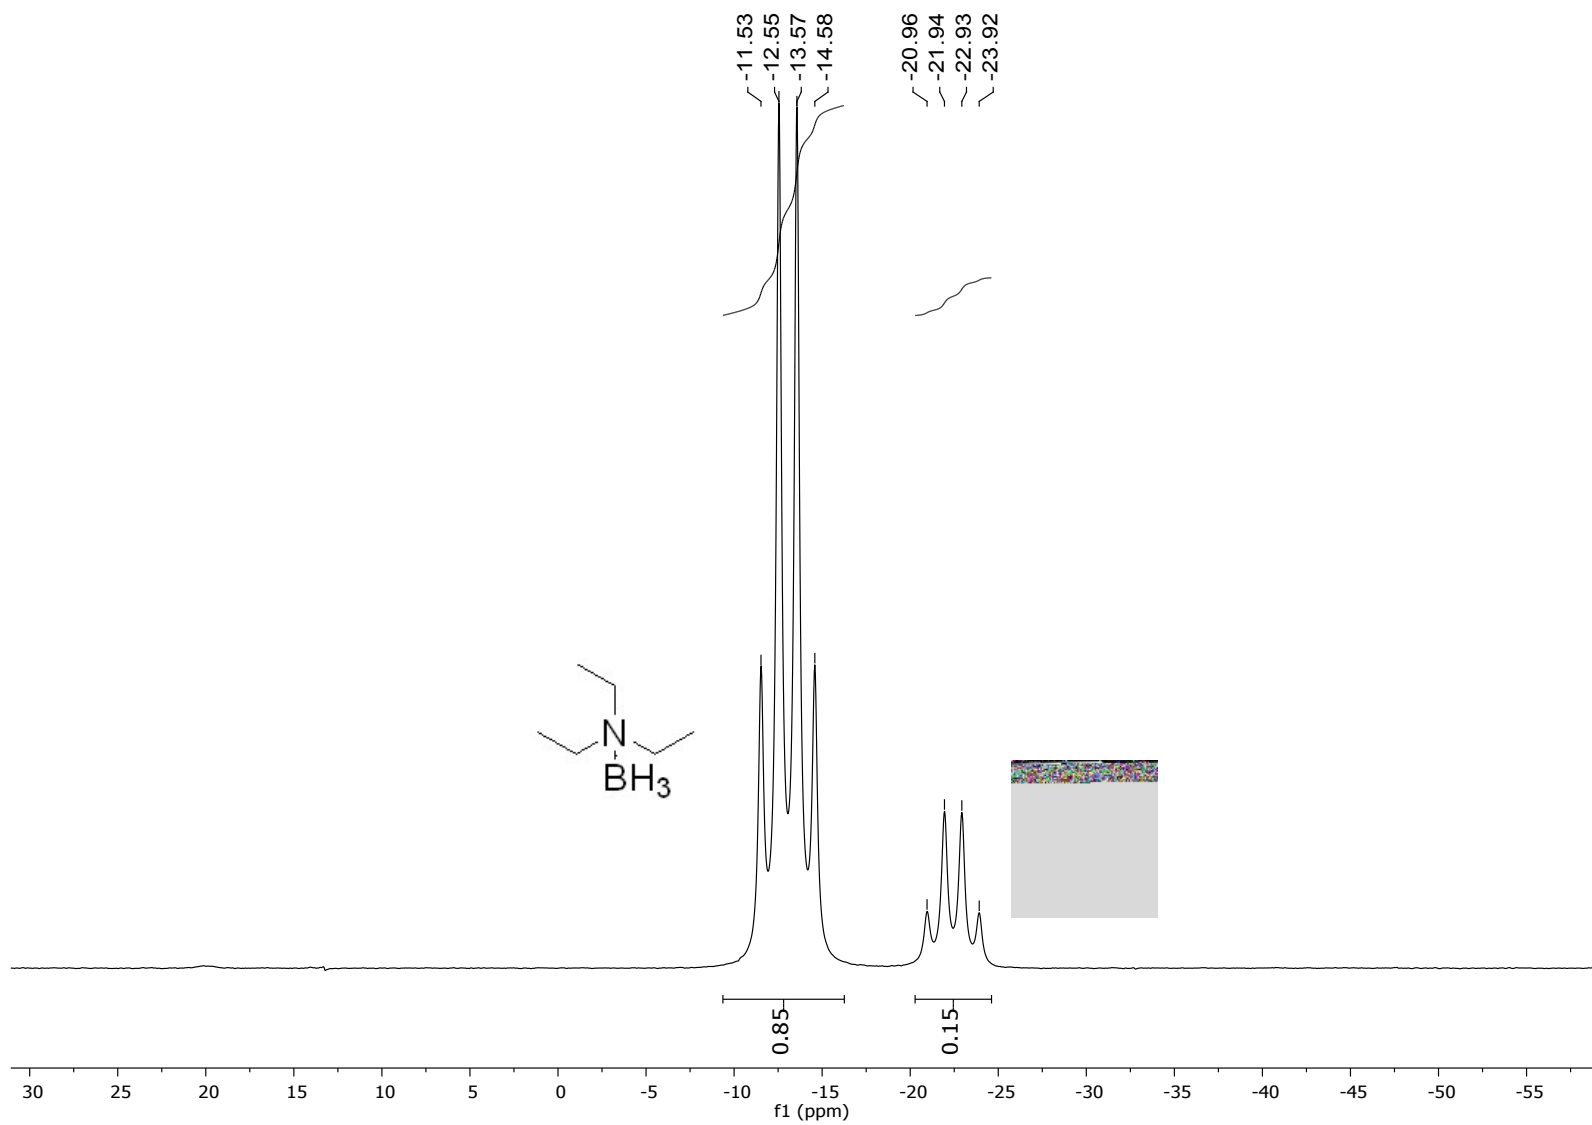

$^{11}\text{B}$  NMR (96 MHz, THF) for Table 3, Entry 5

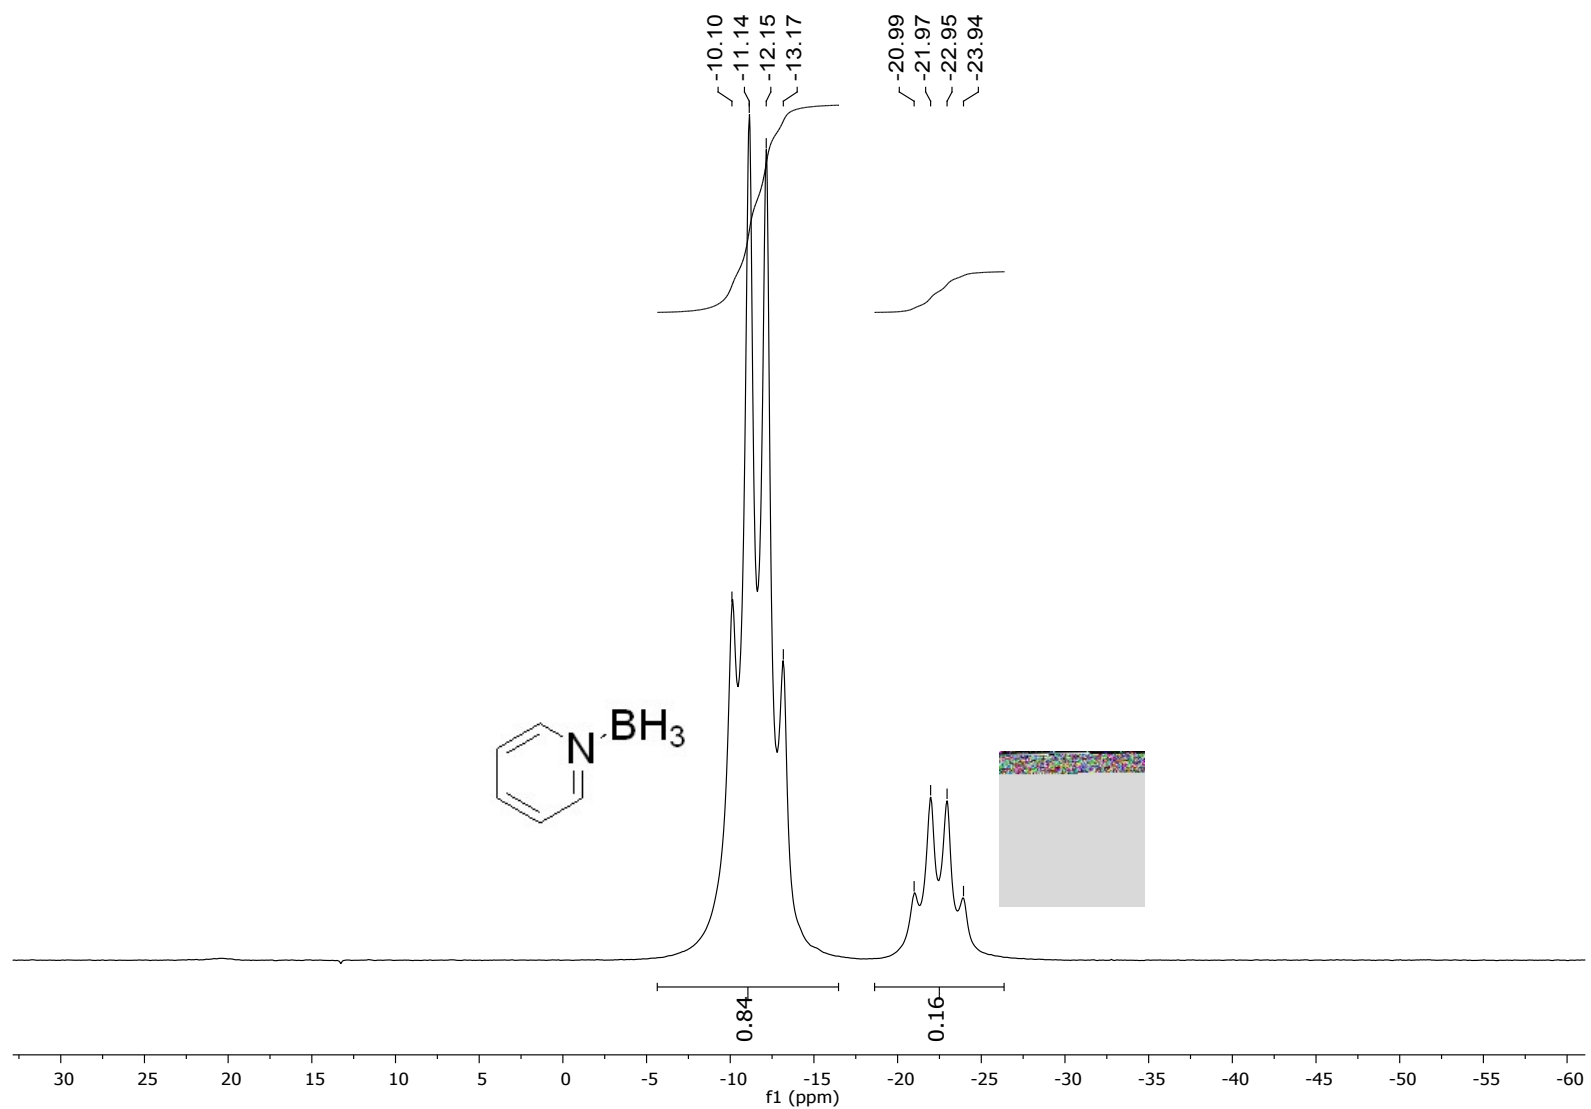

$^{11}\text{B}$  NMR (96 MHz, THF) for Table 3, Entry 6

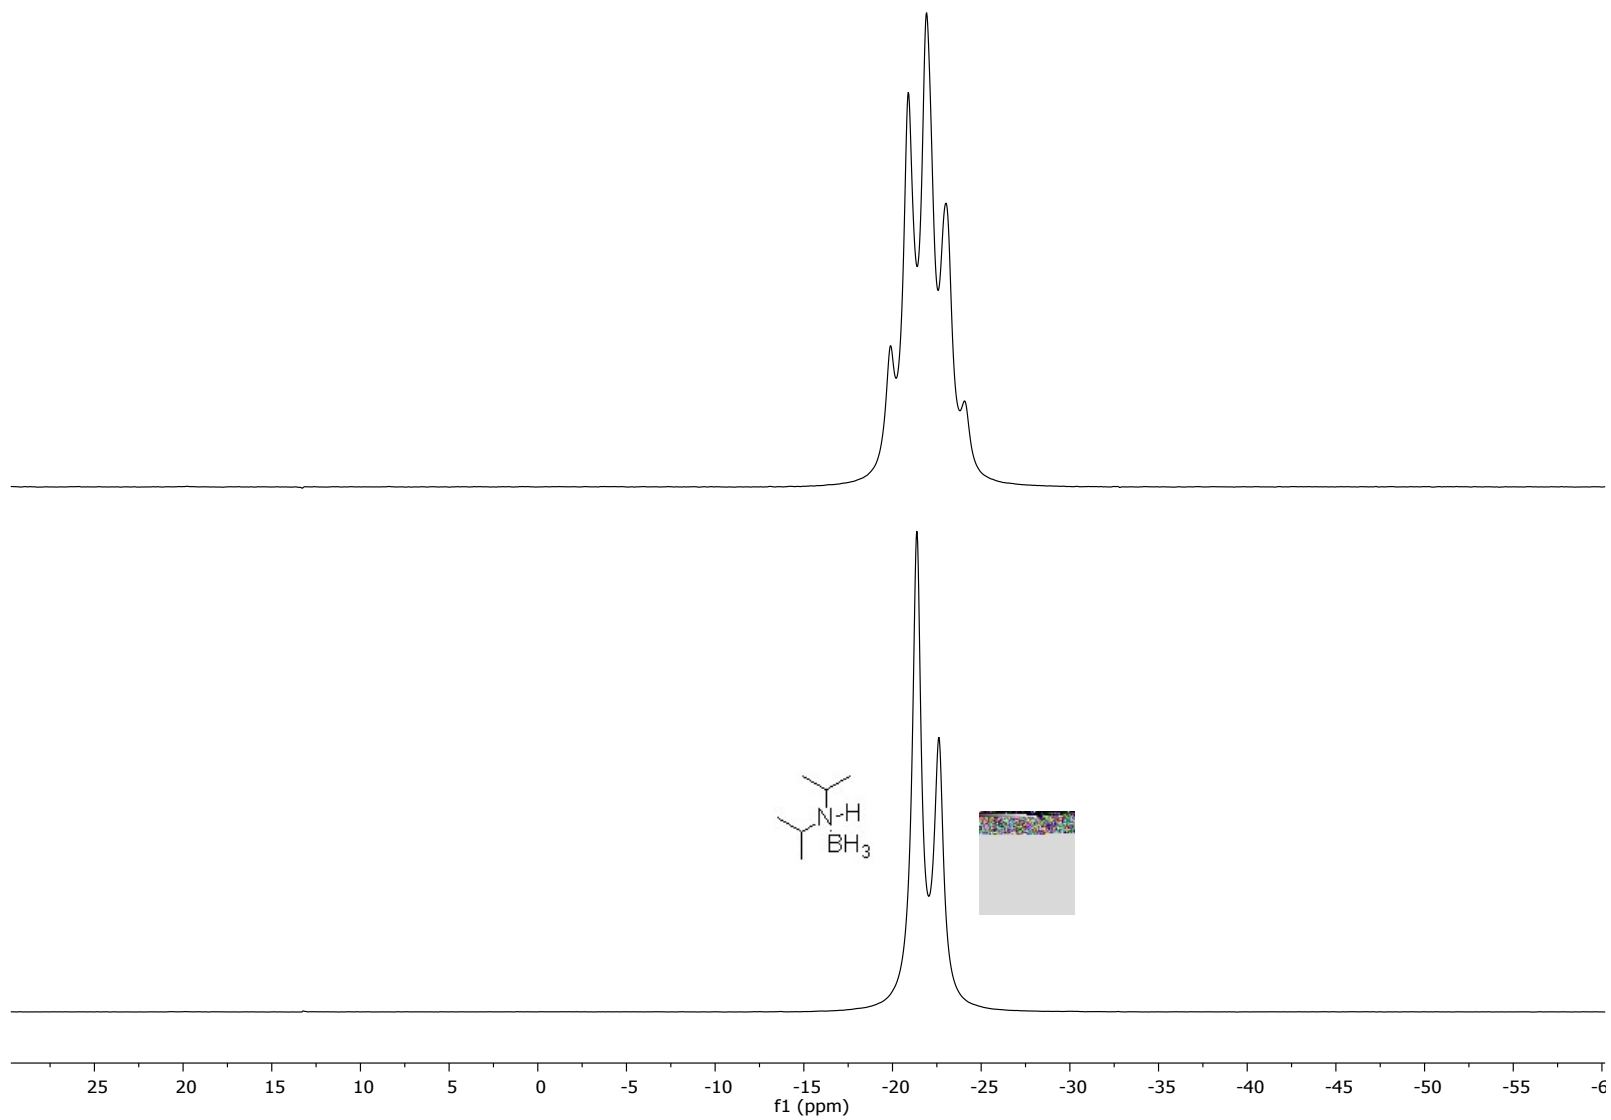

$^1\text{H}$  coupled and  $^1\text{H}$  decoupled spectra  $^{11}\text{B}$  NMR (96 MHz, THF) for Table 3, Entry 7

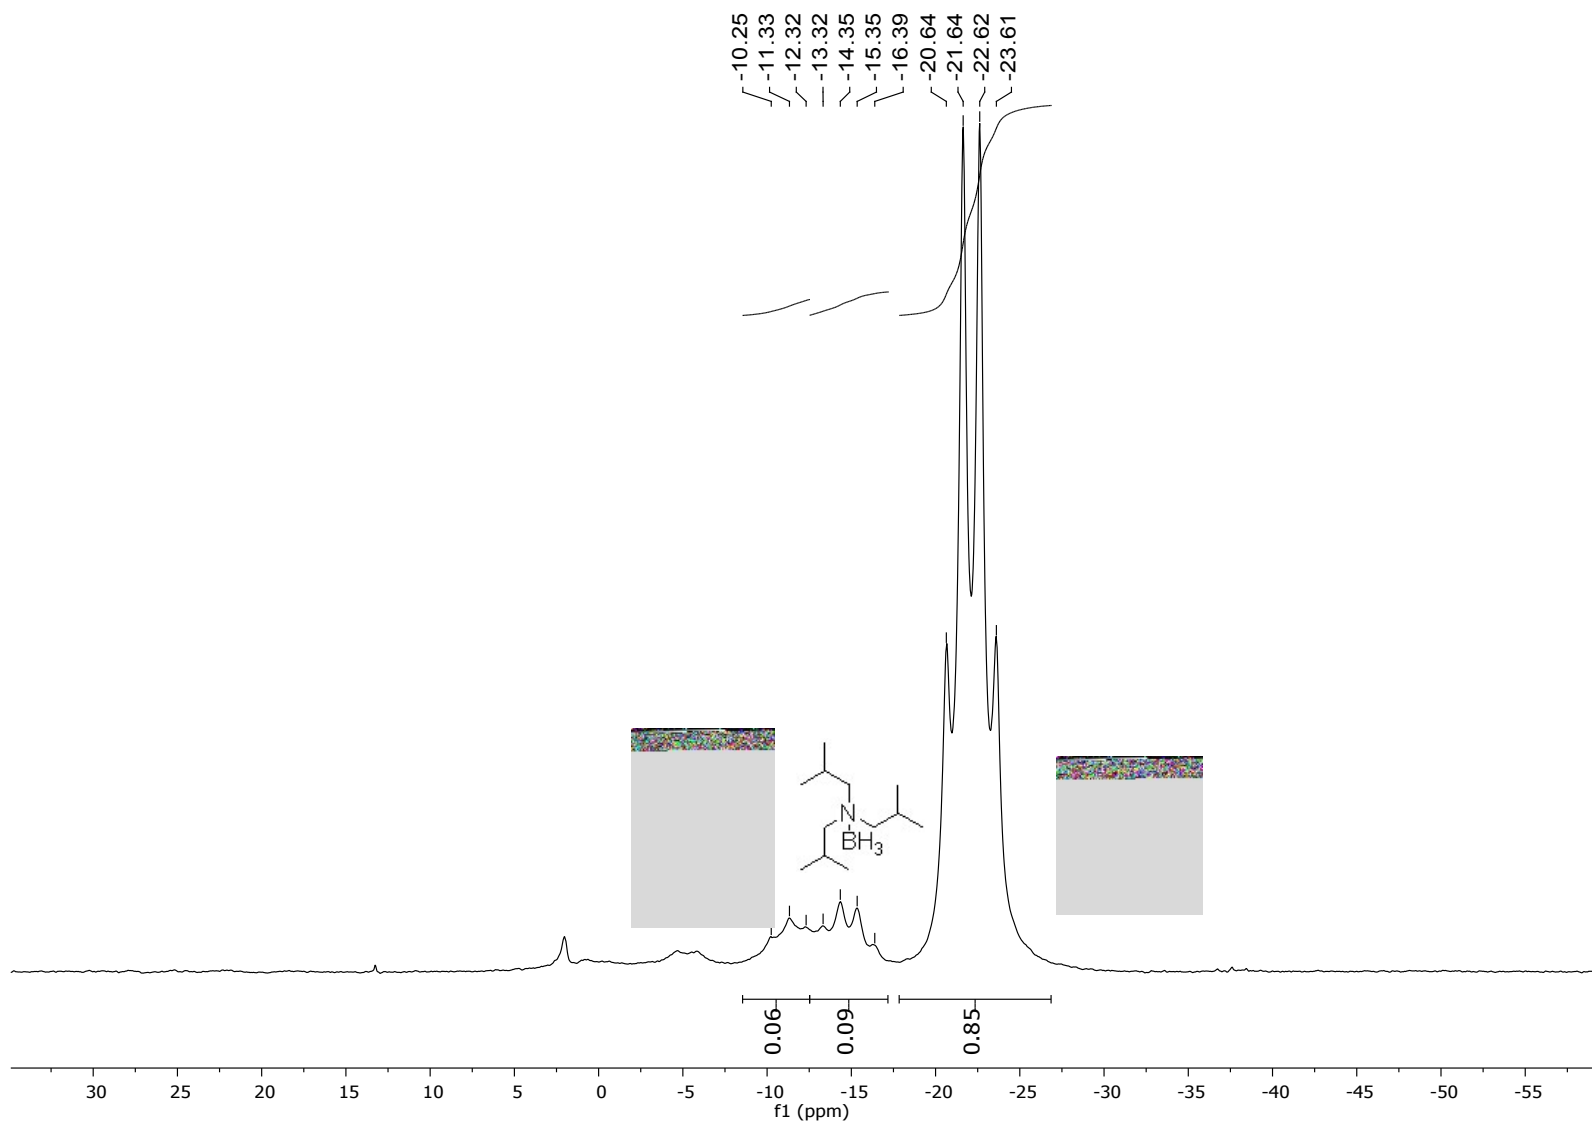

<sup>11</sup>B NMR (96 MHz, THF) for Table 3, Entry 8

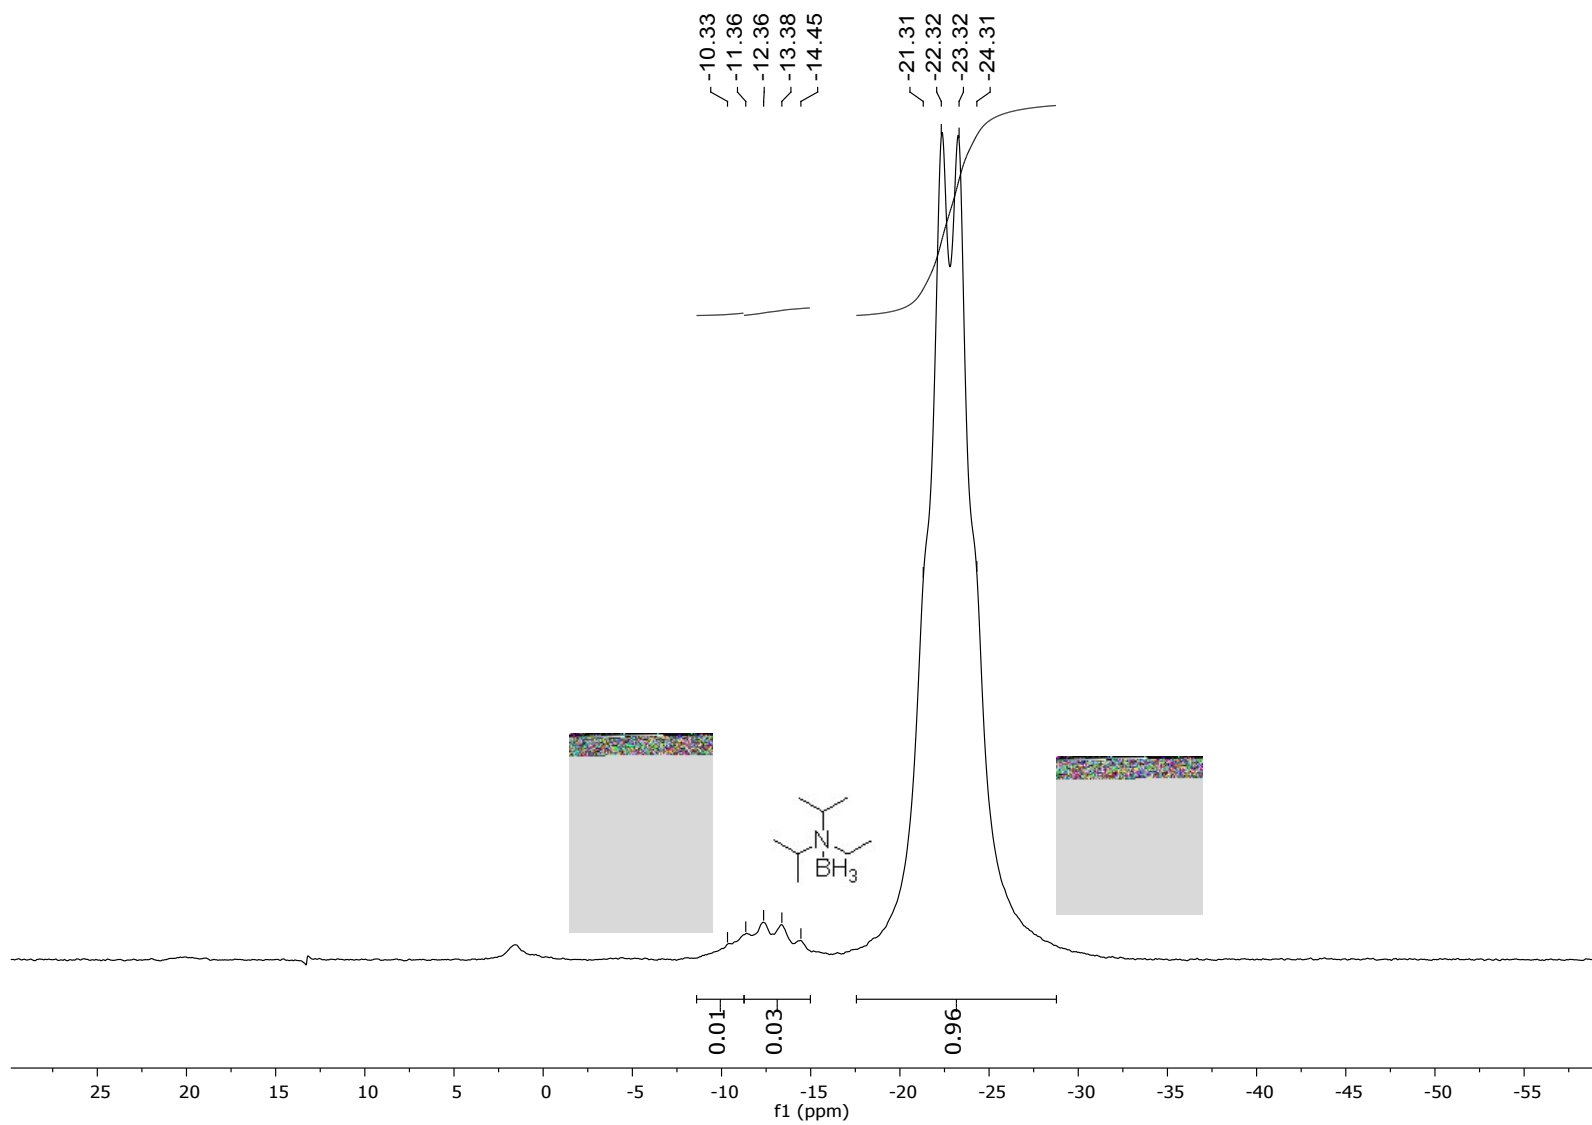

$^{11}\text{B}$  NMR (96 MHz, THF) for Table 3, Entry 9



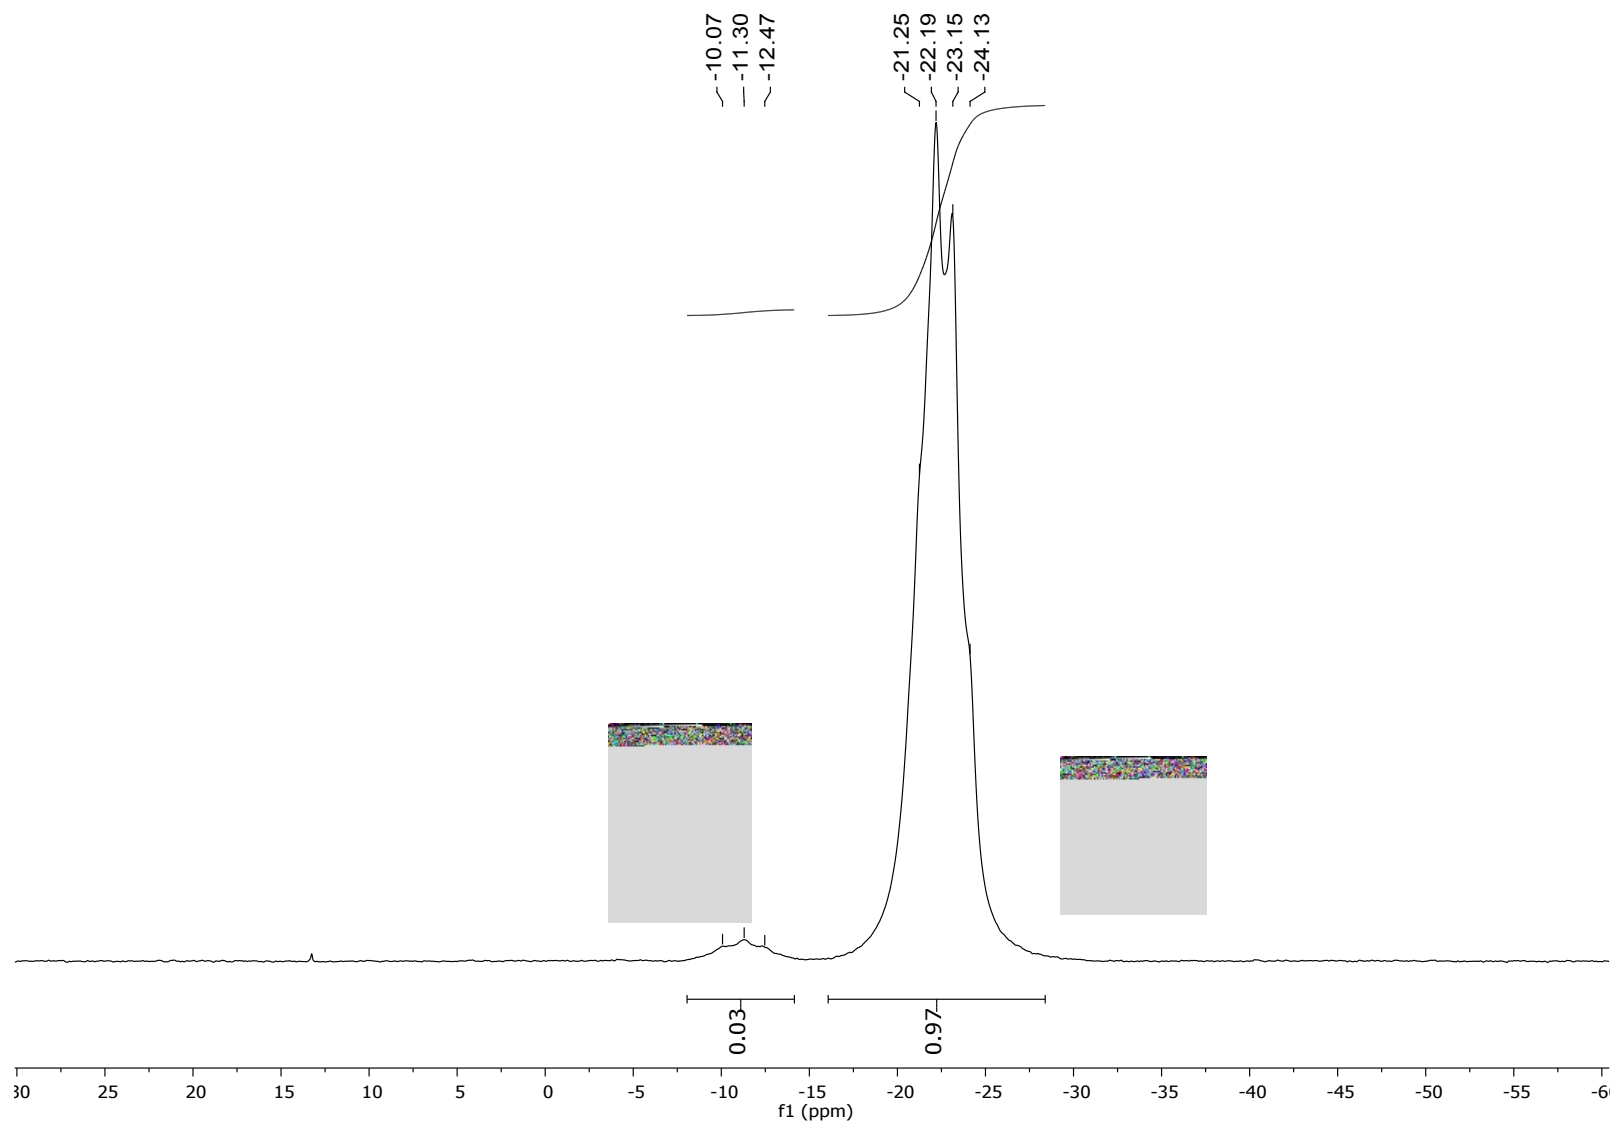

$^{11}\text{B}$  NMR (96 MHz, THF) for Table 3, Entry 10

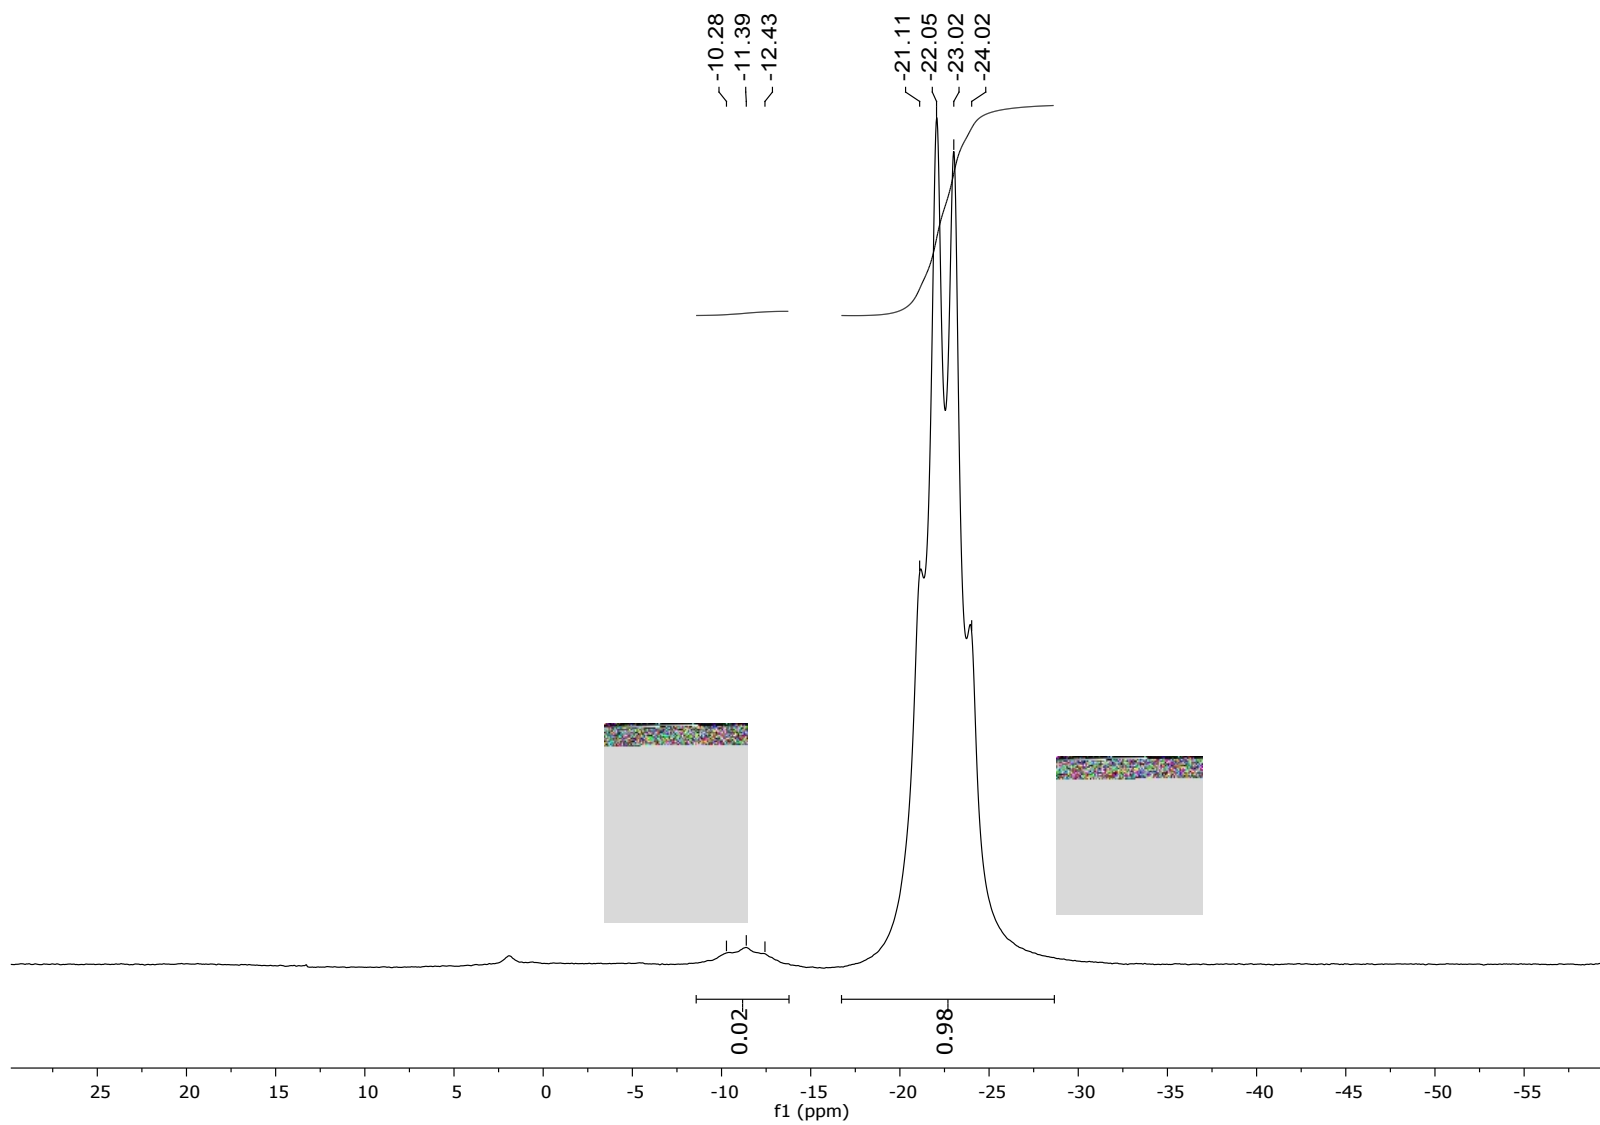

$^{11}\text{B}$  NMR (96 MHz, THF) for Table 3, Entry 11

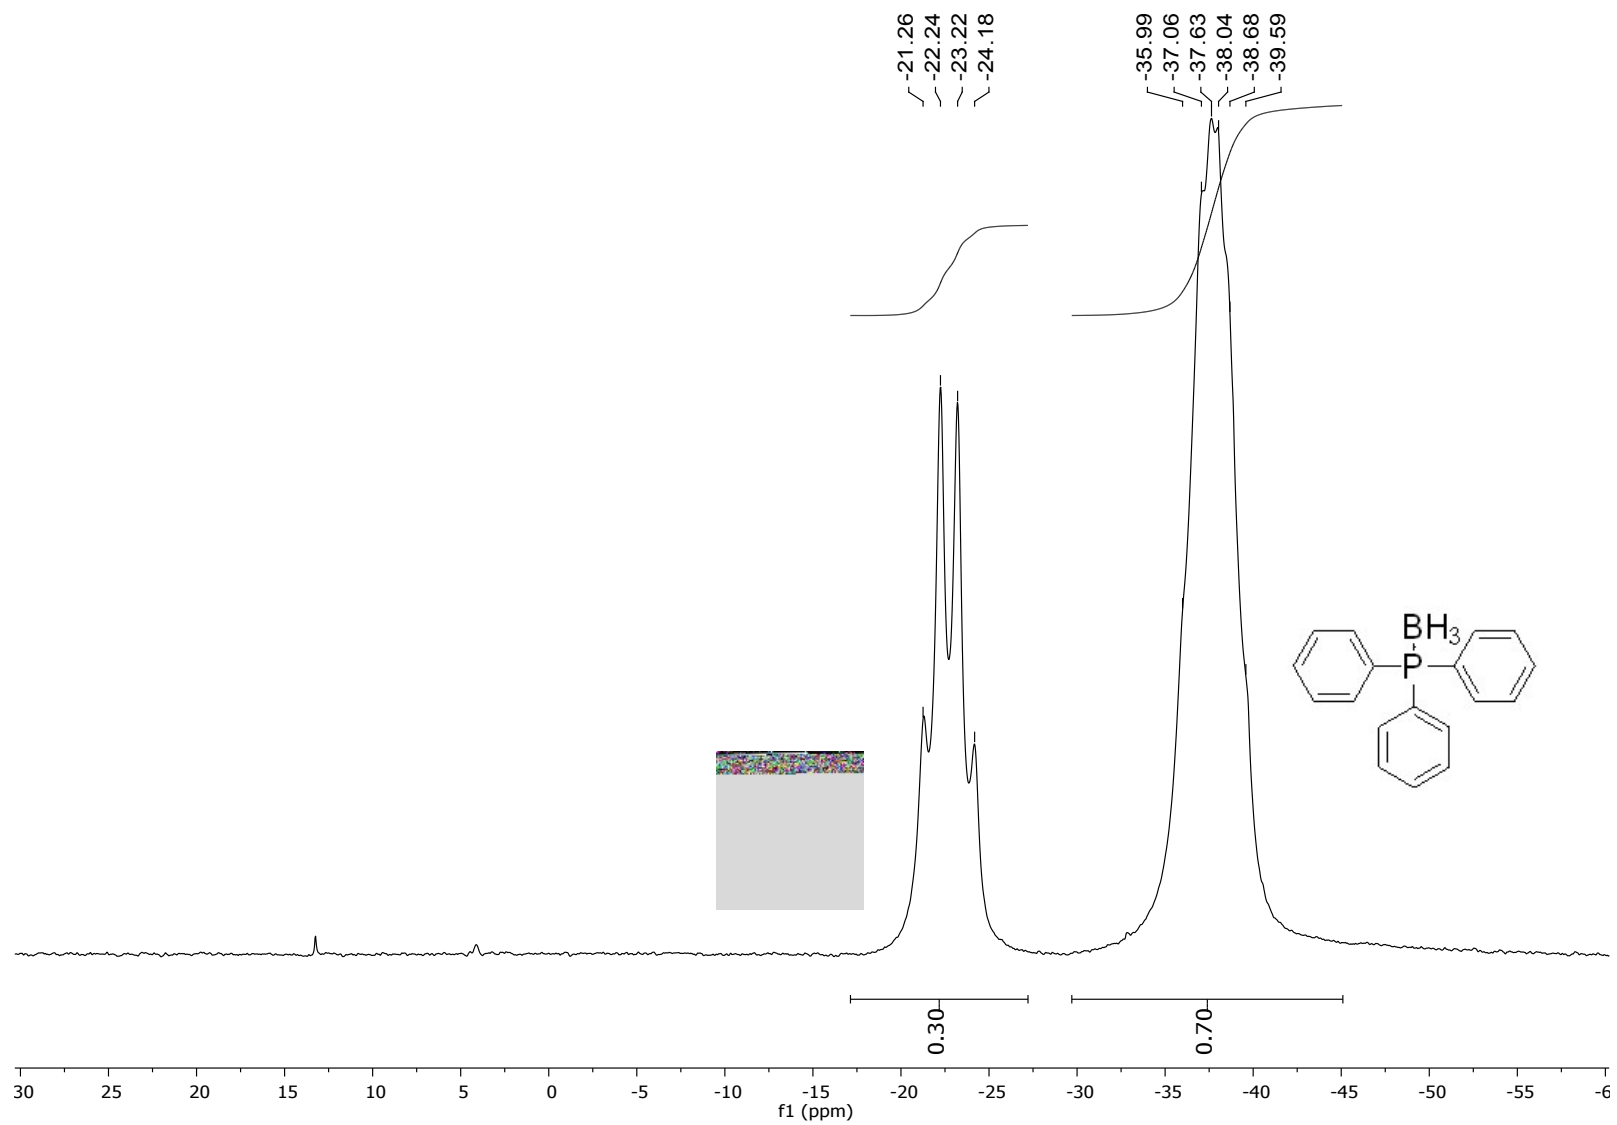

$^{11}\text{B}$  NMR (96 MHz, THF) for Table 3, Entry 12

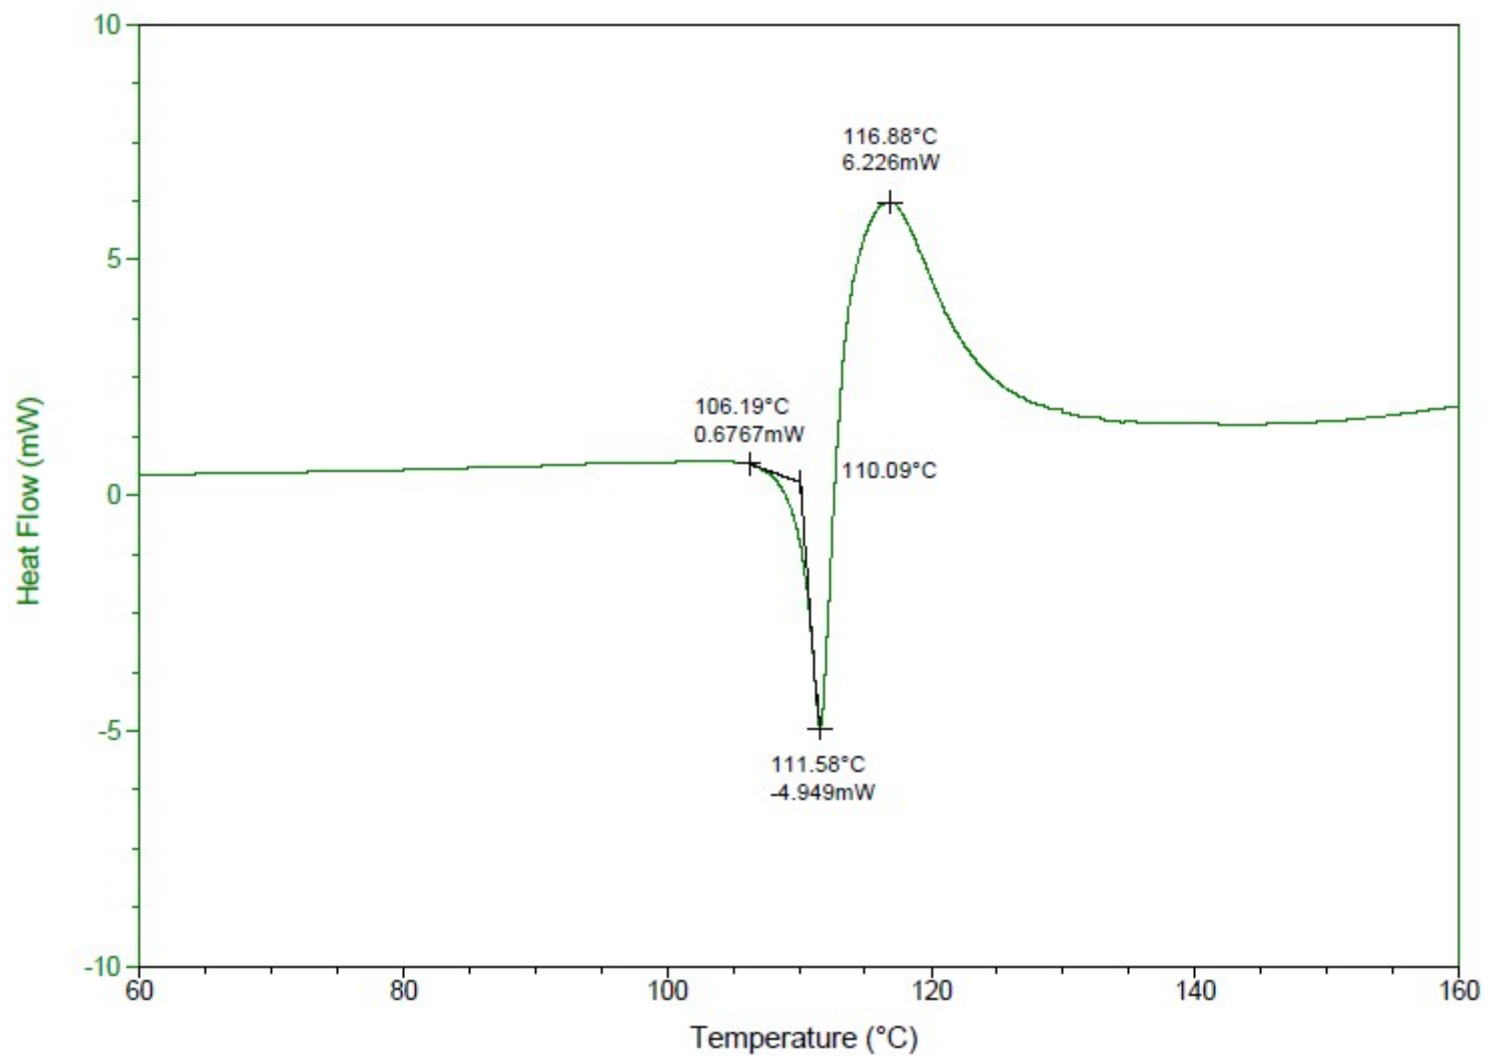

DSC Analysis of AB (1)

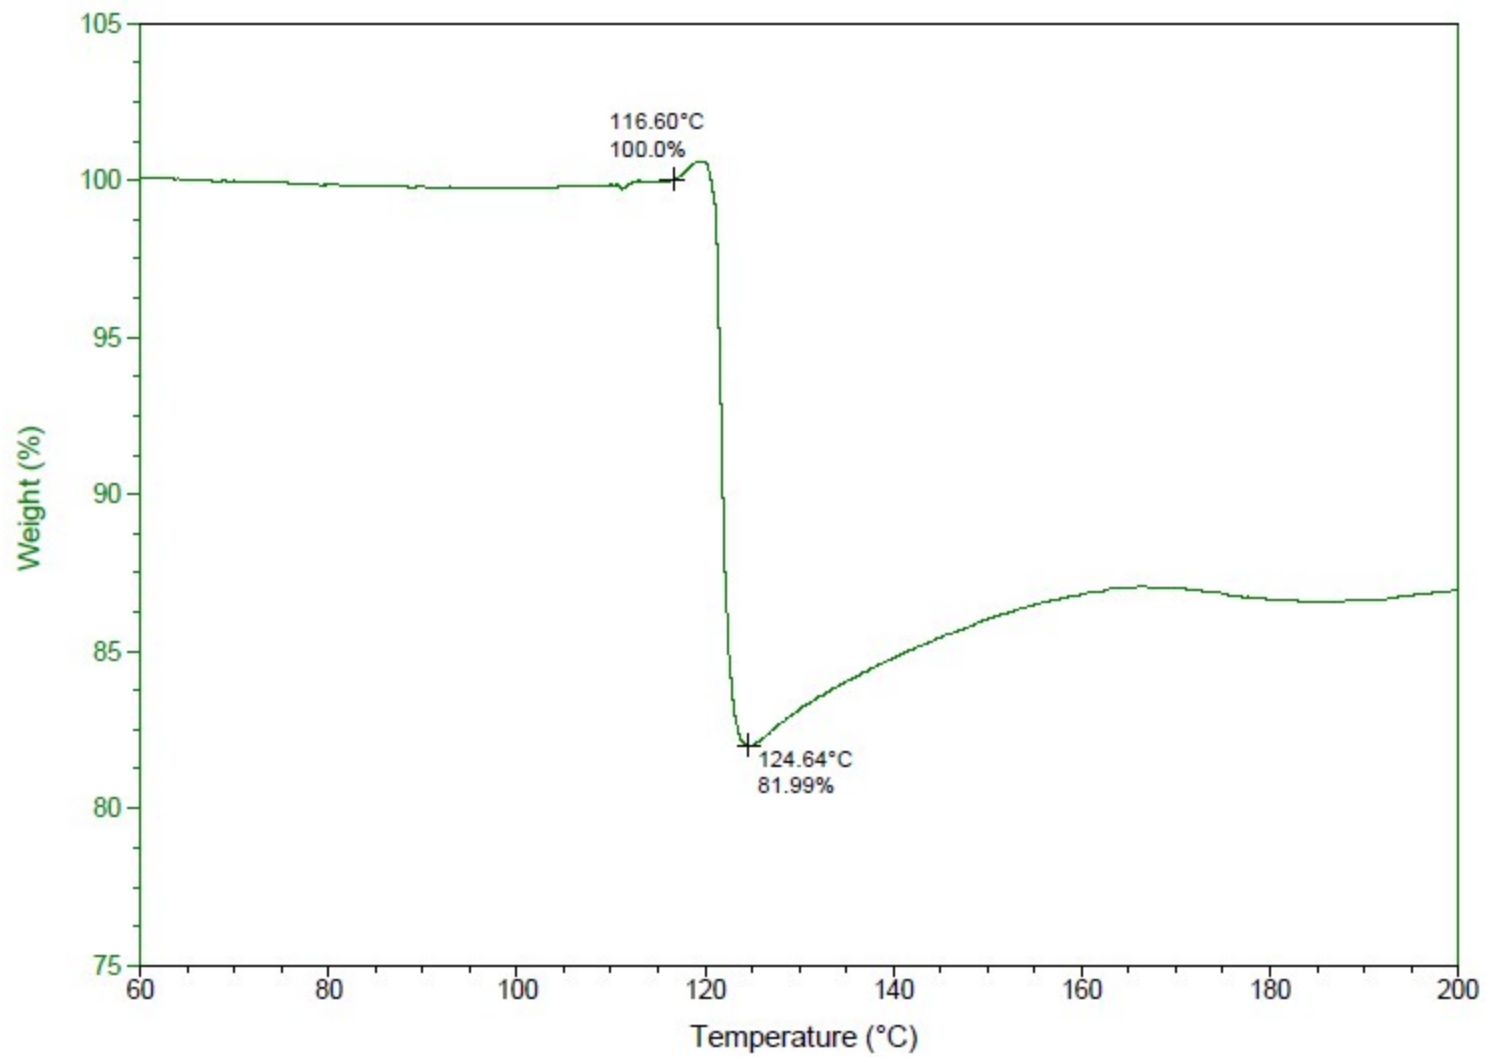

**TG Analysis of AB (1)**
